# Supplementary material for: Quality of urban parks in the perception of city residents with mobility difficulties
Source: PeerJ. 2020 Dec 18;8:e10570. doi: 10.7717/peerj.10570 (PMC7751420; doi:10.7717/peerj.10570)
Supplement: Supplemental Information 1 [file peerj-08-10570-s001.xlsx]

## Sheet: Arkusz1
No.	1. Do you like spending free time in a park?	2. How often do you visit a park?	3. What do you usually do in a park?	4. How much time do you usually spend in a park?	5. What would make you spend more time in a park?	6. How important is the park availability to you?	7. Do you prefer spending time in destination parks or neighbourhood ones?	8. How do you perceive the availability of the two types parks? [destination parks]	8. How do you perceive the availability of the two types parks? [neighbourhood parks]	9. Do you encounter architectural barriers in parks (improper surface, no benches, no slipways, etc.)?	10. What kind of barriers are the most inconvenient for you? Please choose up to 3 answers.	11. Do you take part in the attractions organized in the park (events, meetings, playgrounds for adults, board games, etc.) or usage of the park equipment between separate groups of the respondents.	12. Do you use mobile applications to facilitate movement in public spaces?	13. Do you use the assistive technology devices and mobile assistive applications available in the parks (maps, mock-ups, navigators, etc.)?	1. Gender	2. Age	3. Education	4. Type of disabiity
1	Rather yes	Several times a week	Walk	Around 1 hour	The opportunity to meet with friends/new people	5	I spend time in both types of parks, but more often in neighbourhood ones	3	4	Rather yes	Inappropriate surface, Too few benches, Difficult access to the park	Rather yes	No, but if I knew about them, I would be happy to use them	No, but if I knew about them, I would be happy to use them	Woman	30-39	Higher	Carer
2	Rather yes	Several to over a dozen times a year	Observe	Around 1 hour	Better surface for easier mobility	4	I only spend time in neighbourhood parks	2	2	Rather yes	Inappropriate surface, Difficult access to the park, No slipway	Definitely no	No, and I would not use them even if they were accessible	No, and I would not use them even if they were accessible	Man	>60	High school	Wheelchair users
3	Absolutely yes	Several times a week	Walk	Around 1 hour	Easy access to the park	5	I spend time in both types of parks, but more often in neighbourhood ones	1	2	Rather yes	Inappropriate surface, No sense of security, Inadequate width of alleys	Rather yes	No, but if I knew about them, I would be happy to use them	Yes, I do (please write the name of them) , Maps	Woman	18-29	Higher	Carer
4	Not sure	Several to over a dozen times a year	Observe	Around 1 hour	Better surface for easier mobility	4	I only spend time in neighbourhood parks	5	3	Rather yes	Inappropriate surface, Too few benches, Thresholds too high	Definitely no	No, and I would not use them even if they were accessible	No, and I would not use them even if they were accessible	Woman	>60	Higher	People with mobility problems
5	Rather not	Never	Gym	Up to 30 minutes	Better surface for easier mobility	5	I only spend time in neighbourhood parks	4	2	Rather yes	No toilets, No slipway, Thresholds too high	Rather no	No, and I would not use them even if they were accessible	No, and I would not use them even if they were accessible	Woman	30-39	Higher	Blind people
6	Absolutely yes	Several times a week	Walk	Around 2-3 hours	The opportunity to meet with friends/new people	2	I spend as much time in both types of parks	4	2	Not sure	Inappropriate entrance marking, No markings, Thresholds too high	Rather no	No, but if I knew about them, I would be happy to use them	No, but if I knew about them, I would be happy to use them	Woman	18-29	High school	Blind people
7	Absolutely yes	Everyday	Walk	Around 1 hour	Easy access to the park	5	I spend time in both types of parks, but more often in neighbourhood ones	3	3	Rather no	No slipway, Thresholds too high, Inadequate width of alleys	Definitely no	No, and I would not use them even if they were accessible	Yes, I do (please write the name of them) , Maps	Woman	18-29	Higher	Carer
8	Rather yes	Several to over a dozen times a year	Walk, Talk, Observe	Around 1 hour	Easy access to the park	3	I spend time in both types of parks, but more often in neighbourhood ones	4	3	Rather no	Too few benches, No markings, Difficult access to the park	Rather no	No, but if I knew about them, I would be happy to use them	No, but if I knew about them, I would be happy to use them	Woman	18-29	High school	Blind people
9	Rather not	Several to over a dozen times a year	Walk	Around 2-3 hours	Organized meetings/events in the park	3	I only spend time in neighbourhood parks	3	3	Rather no	Inappropriate entrance marking, No toilets	Rather yes	No, but if I knew about them, I would be happy to use them	No, but if I knew about them, I would be happy to use them	Man	50-59	High school	Partially sighted people
10	Not sure	Several to over a dozen times a year	Talk	Around 1 hour	Better surface for easier mobility	4	I spend as much time in both types of parks	3	2	Absolutely yes	Inappropriate surface, No markings	Rather no	No, but if I knew about them, I would be happy to use them	No, but if I knew about them, I would be happy to use them	Woman	18-29	High school	Blind people
11	Absolutely yes	Several times a week	Walk, Talk	Around 2-3 hours	Better surface for easier mobility	4	I only spend time in neighbourhood parks	3	3	Absolutely yes	Inappropriate surface, No toilets, Inadequate width of alleys	Rather no	No, but if I knew about them, I would be happy to use them	No, and I would not use them even if they were accessible	Man	18-29	High school	Wheelchair users
12	Rather yes	Several times a week	Walk, Talk	Around 2-3 hours	Easy access to the park	5	I spend time in both types of parks, but more often in neighbourhood ones	2	2	Rather yes	Inappropriate surface, Difficult access to the park, No toilets	Rather no	No, but if I knew about them, I would be happy to use them	No, but if I knew about them, I would be happy to use them	Man	30-39	High school	Wheelchair users
13	Rather not	Several to over a dozen times a year	Observe, Read	Around 2-3 hours	Better surface for easier mobility	2	I only spend time in destination parks	4	4	Not sure	Inappropriate surface, No programme, No toilets	Definitely no	No, but if I knew about them, I would be happy to use them	No, but if I knew about them, I would be happy to use them	Woman	30-39	High school	Wheelchair users
14	Absolutely yes	Several times a month	Walk, Talk, Observe, Photo	Around 2-3 hours	Better surface for easier mobility	4	I spend time in both types of parks, but more often in neighbourhood ones	5	3	Not sure	Inappropriate surface, No toilets, Thresholds too high	Definitely no	No, but if I knew about them, I would be happy to use them	No, and I would not use them even if they were accessible	Woman	18-29	High school	Wheelchair users
15	Absolutely yes	Several times a month	Walk	Around 1 hour	Easy access to the park	5	I spend time in both types of parks, but more often in neighbourhood ones	2	2	Rather yes	Inappropriate entrance marking, Too few benches, No markings	Rather no	Yes, I do (please write the name of them) , Totupoint, google maps	No, but if I knew about them, I would be happy to use them	Man	50-59	Higher	Blind people
16	Absolutely yes	Several times a week	Walk, Talk, Observe	Around 1 hour	The opportunity to meet with friends/new people	4	I spend time in both types of parks, but more often in destination ones	2	2	Rather no	Inappropriate entrance marking, Too few benches, No markings	Rather yes	No, but if I knew about them, I would be happy to use them	Yes, I do (please write the name of them) , Maps, Models	Woman	18-29	Higher	Partially sighted people
17	Rather yes	Several times a week	Talk, Read	Around 1 hour	Better surface for easier mobility	3	I only spend time in neighbourhood parks	1	1	Rather yes	Inappropriate entrance marking, Too few benches, Difficult access to the park	Rather no	No, but if I knew about them, I would be happy to use them	No, but if I knew about them, I would be happy to use them	Woman	50-59	High school	Partially sighted people
18	Not sure	Several times a month	Walk	Up to 30 minutes	Organized meetings/events in the park	4	I only spend time in neighbourhood parks	1	4	Rather yes	Inappropriate surface, No sense of security, No toilets	Definitely no	No, but if I knew about them, I would be happy to use them	No, but if I knew about them, I would be happy to use them	Man	50-59	Higher	Blind people
19	Not sure	Several to over a dozen times a year	Walk, Talk, Observe, Read	Around 1 hour	Better surface for easier mobility	5	I only spend time in neighbourhood parks	3	3	Absolutely yes	Difficult access to the park, No slipway, Thresholds too high	Rather no	No, but if I knew about them, I would be happy to use them	No, but if I knew about them, I would be happy to use them	Woman	30-39	Higher	Wheelchair users
20	Rather yes	Several times a month	Walk, Talk, Observe	Around 1 hour	Better surface for easier mobility	5	I only spend time in neighbourhood parks	3	2	Absolutely yes	Inappropriate surface, No sense of security, No toilets,	Rather no	No, but if I knew about them, I would be happy to use them	No, but if I knew about them, I would be happy to use them	Man	40-49	High school	Wheelchair users
21	Rather yes	Several times a week	Walk, Observe, Read	Around 2-3 hours	Better surface for easier mobility	5	I spend time in both types of parks, but more often in neighbourhood ones	1	4	Absolutely yes	Inappropriate surface, Too few benches, No railings	Rather no	No, and I would not use them even if they were accessible	No, and I would not use them even if they were accessible	Man	>60	High school	People with mobility problems
22	Absolutely yes	Several times a week	Walk, Talk, Read	Around 1 hour	More benches	4	I spend as much time in both types of parks	3	4	Rather yes	Too few benches, Thresholds too high	Rather no	No, and I would not use them even if they were accessible	No, but if I knew about them, I would be happy to use them	Woman	18-29	High school	Partially sighted people
23	Not sure	Several to over a dozen times a year	Walk, Talk	Up to 30 minutes	Better surface for easier mobility	4	I only spend time in neighbourhood parks	1	1	Absolutely yes	Inappropriate surface, No slipway, Thresholds too high	Rather no	No, but if I knew about them, I would be happy to use them	No, but if I knew about them, I would be happy to use them	Woman	18-29	Higher	Wheelchair users
24	Absolutely yes	Several to over a dozen times a year	Walk	Over 3 hours	The opportunity to meet with friends/new people	5	I only spend time in neighbourhood parks	1	3	Not sure	Too few benches, No sense of security	Definitely no	No, and I would not use them even if they were accessible	No, but if I knew about them, I would be happy to use them	Man	40-49	Basic	Partially sighted people
25	Absolutely yes	Several to over a dozen times a year	Talk	Around 1 hour	Better surface for easier mobility	5	I only spend time in neighbourhood parks	1	1	Absolutely yes	Inappropriate surface, No sense of security, No toilets	Definitely no	No, but if I knew about them, I would be happy to use them	No, and I would not use them even if they were accessible	Woman	18-29	Basic	Wheelchair users
26	Rather yes	Several times a week	Walk, Gym	Around 1 hour	Better surface for easier mobility	4	I spend time in both types of parks, but more often in neighbourhood ones	2	2	Rather yes	Inappropriate surface, No programme, Difficult access to the park,	Rather no	No, and I would not use them even if they were accessible	No, but if I knew about them, I would be happy to use them	Man	18-29	Higher	Carer
27	Rather yes	Several times a month	Walk, Talk, Observe, Bike	Up to 30 minutes	The opportunity to meet with friends/new people	3	I only spend time in neighbourhood parks	2	3	Absolutely yes	Too few benches, No markings, No programme	Not sure	No, and I would not use them even if they were accessible	No, but if I knew about them, I would be happy to use them	Man	18-29	High school	Partially sighted people
28	Absolutely yes	Several times a week	Walk, Talk, Gym	Around 1 hour	Attractive plant compositons	3	I spend time in both types of parks, but more often in neighbourhood ones	3	3	Rather no	Inappropriate entrance marking, Too few benches, No sense of security	Rather yes	No, but if I knew about them, I would be happy to use them	No, but if I knew about them, I would be happy to use them	Woman	18-29	Higher	Carer
29	Absolutely yes	Everyday	Walk, Talk, Observe	Around 1 hour	Attractive plant compositons	5	I only spend time in neighbourhood parks	2	2	Rather yes	No slipway, Thresholds too high	Absolutely yes	No, but if I knew about them, I would be happy to use them	Yes, I do (please write the name of them) Maps, Models	Woman	40-49	High school	Carer
30	Absolutely yes	Several times a week	Walk, Talk, Lying on grass	Up to 30 minutes	Organized meetings/events in the park	5	I spend time in both types of parks, but more often in neighbourhood ones	3	3	Not sure	No sense of security, Difficult access to the park, No toilets	Rather no	Yes, I do (please write the name of them) , Google maps, jakdojade	Yes, I do (please write the name of them) , Maps	Woman	18-29	Higher	Carer
31	Absolutely yes	Several times a month	Walk, Gym	Around 1 hour	More benches	4	I spend time in both types of parks, but more often in destination ones	3	2	Not sure	Inappropriate surface, Too few benches, No toliets	Absolutely yes	No, but if I knew about them, I would be happy to use them	Yes, I do (please write the name of them)	Man	18-29	Higher	Carer
32	Absolutely yes	Several times a week	Observe	Around 1 hour	Better surface for easier mobility	5	I spend time in both types of parks, but more often in neighbourhood ones	1	3	Absolutely yes	Inappropriate surface, No toilets, Thresholds too high	Rather no	No, but if I knew about them, I would be happy to use them	No, but if I knew about them, I would be happy to use them	Woman	>60	Higher	Wheelchair users
33	Rather not	Several to over a dozen times a year	Walk	Around 1 hour	Easy access to the park	5	I only spend time in neighbourhood parks	1	3	Rather yes	Inappropriate surface, No programme, No sense of security	Rather no	No, but if I knew about them, I would be happy to use them	No, but if I knew about them, I would be happy to use them	Woman	40-49	Vocational	People with mobility problems
34	Absolutely yes	Several times a week	Walk	Around 1 hour	Organized meetings/events in the park	5	I spend time in both types of parks, but more often in neighbourhood ones	3	2	Rather no	No programme	Not sure	No, but if I knew about them, I would be happy to use them	No, and I would not use them even if they were accessible	Woman	30-39	Higher	Carer
35	Not sure	Several times a month	Walk, Talk	Around 2-3 hours	Organized meetings/events in the park	3	I spend time in both types of parks, but more often in neighbourhood ones	3	3	Rather no	Too few benches, No programme, Difficult access to the park	Rather yes	No, but if I knew about them, I would be happy to use them	No, but if I knew about them, I would be happy to use them	Woman	50-59	High school	Blind people
36	Absolutely yes	Several times a week	Walk, Talk	Up to 30 minutes	Attractive plant compositons	4	I only spend time in neighbourhood parks	2	2	Rather yes	Inappropriate surface, Too few benches, No toilets	Rather no	No, but if I knew about them, I would be happy to use them	No, but if I knew about them, I would be happy to use them	Woman	18-29	High school	People with mobility problems
37	Rather yes	Several times a month	Walk, Talk	Around 2-3 hours	Organized meetings/events in the park	4	I only spend time in neighbourhood parks	3	4	Rather no	Inappropriate surface, No programme, No toilets,	Rather yes	No, but if I knew about them, I would be happy to use them	No, but if I knew about them, I would be happy to use them	Woman	50-59	Vocational	Wheelchair users
38	Rather yes	Several to over a dozen times a year	Walk, Talk, Observe	Around 2-3 hours	The opportunity to meet with friends/new people	4	I only spend time in neighbourhood parks	4	2	Absolutely yes	Inappropriate surface, No markings, No sense of security,	Rather no	No, and I would not use them even if they were accessible	No, and I would not use them even if they were accessible	Woman	18-29	Higher	Carer
39	Rather yes	Several times a week	Walk, Observe, Gym	Around 2-3 hours	Organized meetings/events in the park	5	I spend time in both types of parks, but more often in neighbourhood ones	2	3	Rather no	Too few benches, No programme, No railings	Rather yes	No, but if I knew about them, I would be happy to use them	No, but if I knew about them, I would be happy to use them	Man	50-59	Vocational	People with mobility problems
40	Absolutely yes	Several times a month	Walk, Talk, Observe	Around 1 hour	Better surface for easier mobility	5	I spend time in both types of parks, but more often in neighbourhood ones	4	2	Absolutely yes	Inappropriate surface, Difficult access to the park, No slipway,	Definitely no	No, but if I knew about them, I would be happy to use them	No, but if I knew about them, I would be happy to use them	Man	40-49	High school	Wheelchair users
41	Rather yes	Everyday	Walk, Talk, Eat	Up to 30 minutes	Better surface for easier mobility	3	I only spend time in neighbourhood parks	3	4	Rather yes	Inappropriate entrance marking, Too few benches, No markings	Rather no	Yes, I do (please write the name of them) , Seeing Assistant Move	No, but if I knew about them, I would be happy to use them	Man	18-29	Higher	Blind people
42	Absolutely yes	Several to over a dozen times a year	Observe	Up to 30 minutes	Better surface for easier mobility	4	I spend time in both types of parks, but more often in neighbourhood ones	2	2	Not sure	No toilets, Thresholds too high, Inadequate width of alleys	Rather no	No, but if I knew about them, I would be happy to use them	No, but if I knew about them, I would be happy to use them	Woman	40-49	Higher	People with mobility problems
43	Absolutely yes	Several times a week	Walk, Read	Around 2-3 hours	Better surface for easier mobility	5	I only spend time in neighbourhood parks	1	3	Rather yes	Inappropriate surface, Too few benches, Difficult access to the park	Rather no	No, but if I knew about them, I would be happy to use them	No, but if I knew about them, I would be happy to use them	Woman	40-49	Higher	People with mobility problems
44	Absolutely yes	Everyday	Gym	Around 2-3 hours	Better surface for easier mobility	5	I spend as much time in both types of parks	3	3	Rather yes	Inappropriate entrance marking, No markings, Difficult access to the park	Rather yes	No, but if I knew about them, I would be happy to use them	No, but if I knew about them, I would be happy to use them	Man	40-49	Vocational	Blind people
45	Absolutely yes	Several times a week	Walk	Around 1 hour	More benches	5	I spend time in both types of parks, but more often in neighbourhood ones	3	4	Not sure	Inappropriate entrance marking, No markings, No railings	Rather yes	No, but if I knew about them, I would be happy to use them	No, but if I knew about them, I would be happy to use them	Man	30-39	Higher	Partially sighted people
46	Absolutely yes	Several times a month	Walk, Talk	Up to 30 minutes	Attractive plant compositons	4	I spend time in both types of parks, but more often in neighbourhood ones	3	4	Rather yes	Difficult access to the park, No slipway	Rather no	No, but if I knew about them, I would be happy to use them	No, but if I knew about them, I would be happy to use them	Man	18-29	Higher	Wheelchair users
47	Rather yes	Several to over a dozen times a year	Walk, Observe	Up to 30 minutes	The opportunity to meet with friends/new people	4	I spend time in both types of parks, but more often in neighbourhood ones	4	4	Rather no	No toilets	Rather no	No, but if I knew about them, I would be happy to use them	No, and I would not use them even if they were accessible	Woman	18-29	High school	Partially sighted people
48	Absolutely yes	Several to over a dozen times a year	Walk, Talk, Observe	Around 1 hour	Organized meetings/events in the park	5	I spend time in both types of parks, but more often in destination ones	4	4	Rather yes	Inappropriate surface, No programme, No slipway,	Rather no	No, but if I knew about them, I would be happy to use them	Yes, I do (please write the name of them) , Maps, Models	Man	18-29	Higher	Wheelchair users
49	Absolutely yes	Several times a month	Walk, Talk, Observe	Around 1 hour	Organized meetings/events in the park	5	I spend time in both types of parks, but more often in neighbourhood ones	4	2	Rather yes	Inappropriate surface, Too few benches, No toilets	Rather no	No, but if I knew about them, I would be happy to use them	Yes, I do (please write the name of them) , Maps	Woman	18-29	Higher	Carer
50	Rather yes	Several times a month	Walk	Around 1 hour	Lepsza infrastruktura i pożądek w parkach również w godzinach wieczorowych	4	I spend time in both types of parks, but more often in neighbourhood ones	4	3	Not sure	No programme, No toilets	Not sure	No, but if I knew about them, I would be happy to use them	No, but if I knew about them, I would be happy to use them	Man	40-49	Higher	Carer
51	Rather not	Several to over a dozen times a year	Walk	Around 1 hour	Better surface for easier mobility	2	I only spend time in neighbourhood parks	2	2	Rather yes	Inappropriate surface, Too few benches, No toilets	Rather no	No, and I would not use them even if they were accessible	No, but if I knew about them, I would be happy to use them	Man	50-59	High school	People with mobility problems
52	Absolutely yes	Everyday	Walk	Around 2-3 hours	Organized meetings/events in the park	5	I spend time in both types of parks, but more often in neighbourhood ones	4	4	Rather no	Too few benches, Difficult access to the park, No toilets	Absolutely yes	No, but if I knew about them, I would be happy to use them	No, but if I knew about them, I would be happy to use them	Woman	30-39	High school	Carer
53	Absolutely yes	Several times a week	Walk	Around 2-3 hours	More benches	5	I spend time in both types of parks, but more often in neighbourhood ones	5	5	Not sure	Too few benches, No programme, No sense of security	Rather yes	No, but if I knew about them, I would be happy to use them	No, but if I knew about them, I would be happy to use them	Woman	18-29	High school	Carer
54	Rather yes	Several times a week	Walk	Around 2-3 hours	The opportunity to meet with friends/new people	5	I spend as much time in both types of parks	4	3	Rather yes	Inappropriate surface, Inappropriate entrance marking, Thresholds too high	Rather yes	No, but if I knew about them, I would be happy to use them	No, but if I knew about them, I would be happy to use them	Man	40-49	Vocational	Partially sighted people
55	Absolutely yes	Everyday	Walk	Around 2-3 hours	More benches	5	I only spend time in neighbourhood parks	4	4	Rather no	Inappropriate surface, No sense of security, No toilets	Rather yes	No, but if I knew about them, I would be happy to use them	No, but if I knew about them, I would be happy to use them	Woman	30-39	Higher	People with mobility problems
56	Absolutely yes	Several times a month	Walk, Talk, Observe	Around 2-3 hours	Organized meetings/events in the park	5	I spend time in both types of parks, but more often in destination ones	4	4	Rather no	Inappropriate surface, No programme, No toilets	Absolutely yes	No, but if I knew about them, I would be happy to use them	Yes, I do (please write the name of them)	Man	50-59	Higher	Carer
57	Absolutely yes	Several times a week	Walk, Observe	Around 1 hour	The opportunity to meet with friends/new people	5	I spend time in both types of parks, but more often in neighbourhood ones	2	2	Rather yes	Inappropriate entrance marking, Too few benches, No sense of security	Rather no	No, but if I knew about them, I would be happy to use them	No, and I would not use them even if they were accessible	Woman	>60	High school	Partially sighted people
58	Rather yes	Several times a month	Observe	Around 1 hour	Better surface for easier mobility	4	I spend time in both types of parks, but more often in neighbourhood ones	2	2	Absolutely yes	Inappropriate surface, Too few benches, No sense of security	Rather yes	No, but if I knew about them, I would be happy to use them	No, but if I knew about them, I would be happy to use them	Woman	18-29	High school	Partially sighted people
59	Absolutely yes	Several times a month	Walk, Talk, Observe	Around 1 hour	Organized meetings/events in the park	4	I spend time in both types of parks, but more often in neighbourhood ones	2	4	Absolutely yes	No programme, No railings, Thresholds too high	Rather yes	No, but if I knew about them, I would be happy to use them	No, and I would not use them even if they were accessible	Woman	18-29	Higher	People with mobility problems
60	Rather yes	Several to over a dozen times a year	Walk	Around 1 hour	Better surface for easier mobility	5	I spend time in both types of parks, but more often in destination ones	2	4	Absolutely yes	Inappropriate surface, No programme, No toilets	Rather no	No, but if I knew about them, I would be happy to use them	No, and I would not use them even if they were accessible	Woman	30-39	Higher	Wheelchair users
61	Rather yes	Several to over a dozen times a year	Walk, Talk	Around 1 hour	Better surface for easier mobility	5	I spend time in both types of parks, but more often in destination ones	2	2	Absolutely yes	Inappropriate surface, Inappropriate entrance marking, No sense of security	Rather no	No, but if I knew about them, I would be happy to use them	No, but if I knew about them, I would be happy to use them	Woman	40-49	High school	Blind people
62	Absolutely yes	Everyday	Walk, Observe	Around 2-3 hours	Organized meetings/events in the park	4	I spend time in both types of parks, but more often in neighbourhood ones	3	2	Absolutely yes	Inappropriate surface, Too few benches, No markings	Absolutely yes	No, but if I knew about them, I would be happy to use them	No, but if I knew about them, I would be happy to use them	Woman	40-49	High school	Blind people
63	Rather yes	Several times a month	Walk, Gym	Around 1 hour	The opportunity to meet with friends/new people	4	I spend time in both types of parks, but more often in neighbourhood ones	3	3	Absolutely yes	Inappropriate surface, Too few benches, No programme	Absolutely yes	No, but if I knew about them, I would be happy to use them	No, but if I knew about them, I would be happy to use them	Man	18-29	Vocational	People with mobility problems
64	Not sure	Several to over a dozen times a year	Observe, Gym	Around 1 hour	Better surface for easier mobility	3	I spend time in both types of parks, but more often in destination ones	4	4	Not sure	Inappropriate surface, Too few benches, No toilets	Absolutely yes	No, but if I knew about them, I would be happy to use them	No, but if I knew about them, I would be happy to use them	Man	30-39	Higher	People with mobility problems
65	Rather yes	Several to over a dozen times a year	Read	Around 1 hour	The opportunity to meet with friends/new people	3	I spend time in both types of parks, but more often in neighbourhood ones	3	2	Rather yes	No programme, No toilets, No slipway	Rather no	No, and I would not use them even if they were accessible	No, but if I knew about them, I would be happy to use them	Man	18-29	High school	Partially sighted people
66	Absolutely yes	Everyday	Walk, Talk, Observe, Read, Gym	Around 2-3 hours	Organized meetings/events in the park	5	I spend as much time in both types of parks	4	3	Rather yes	Inappropriate surface, Too few benches, No programme	Not sure	No, but if I knew about them, I would be happy to use them	Yes, I do (please write the name of them) , Maps	Man	30-39	High school	Partially sighted people
67	Rather yes	Several times a month	Read	Around 2-3 hours	Easy access to the park	5	I only spend time in neighbourhood parks	1	3	Absolutely yes	Inappropriate surface, No slipway, Thresholds too high	Rather no	No, and I would not use them even if they were accessible	No, but if I knew about them, I would be happy to use them	Woman	50-59	Higher	Wheelchair users
68	Absolutely yes	Everyday	Walk	Around 1 hour	More benches	4	I only spend time in neighbourhood parks	2	4	Absolutely yes	Inappropriate surface, Too few benches	Definitely no	No, and I would not use them even if they were accessible	No, and I would not use them even if they were accessible	Man	>60	Vocational	People with mobility problems
69	Not sure	Several to over a dozen times a year	Walk	Up to 30 minutes	More benches	5	I only spend time in neighbourhood parks	4	2	Rather yes	Inappropriate surface, Too few benches	Definitely no	No, but if I knew about them, I would be happy to use them	No, and I would not use them even if they were accessible	Man	>60	High school	People with mobility problems
70	Absolutely yes	Several times a week	Gym	Around 2-3 hours	Organized meetings/events in the park	4	I spend time in both types of parks, but more often in neighbourhood ones	5	4	Not sure	Inappropriate surface, Too few benches, Difficult access to the park	Absolutely yes	No, but if I knew about them, I would be happy to use them	No, but if I knew about them, I would be happy to use them	Man	40-49	High school	People with mobility problems
71	Absolutely yes	Everyday	Gym	Around 2-3 hours	mała gastronomia	5	I only spend time in neighbourhood parks	4	5	Rather no	Too few benches, Difficult access to the park, No toilets	Absolutely yes	No, but if I knew about them, I would be happy to use them	No, but if I knew about them, I would be happy to use them	Man	30-39	Vocational	Wheelchair users
72	Absolutely yes	Everyday	Gym	Around 2-3 hours	The opportunity to meet with friends/new people	5	I spend time in both types of parks, but more often in neighbourhood ones	5	5	Rather no	No programme, No toilets, zbyt mała infrastruktura	Absolutely yes	No, but if I knew about them, I would be happy to use them	No, but if I knew about them, I would be happy to use them	Man	30-39	Vocational	Wheelchair users
73	Absolutely yes	Everyday	Observe	Around 1 hour	Attractive plant compositons	4	I spend time in both types of parks, but more often in neighbourhood ones	3	4	Rather yes	Inappropriate surface, Difficult access to the park, No toilets	Absolutely yes	No, but if I knew about them, I would be happy to use them	No, but if I knew about them, I would be happy to use them	Woman	40-49	Higher	Wheelchair users
74	Absolutely yes	Everyday	Gym	Around 1 hour	Other... Food selling points	4	I only spend time in neighbourhood parks	3	5	Rather no	Too few benches, Difficult access to the park	Absolutely yes	No, but if I knew about them, I would be happy to use them	No, but if I knew about them, I would be happy to use them	Woman	30-39	High school	People with mobility problems
75	Absolutely yes	Everyday	Read, Gym	Around 2-3 hours	Organized meetings/events in the park	5	I spend time in both types of parks, but more often in neighbourhood ones	5	5	Rather no	Too few benches, No programme, No sense of security	Absolutely yes	No, but if I knew about them, I would be happy to use them	No, but if I knew about them, I would be happy to use them	Woman	18-29	Higher	Carer
76	Absolutely yes	Everyday	Walk, Gym	Around 2-3 hours	Other... More food selling points	5	I spend time in both types of parks, but more often in neighbourhood ones	5	5	Rather no	Too few benches, No toilets, Lack of infrastructure	Absolutely yes	No, but if I knew about them, I would be happy to use them	No, but if I knew about them, I would be happy to use them	Woman	30-39	Vocational	Wheelchair users
77	Absolutely yes	Everyday	Walk, Gym	Around 2-3 hours	Other... Better infrastructure	5	I spend time in both types of parks, but more often in neighbourhood ones	5	5	Rather no	Too few benches, No sense of security, Lack of infrastructure	Absolutely yes	No, but if I knew about them, I would be happy to use them	No, but if I knew about them, I would be happy to use them	Man	30-39	High school	Wheelchair users
78	Absolutely yes	Everyday	Walk	Around 1 hour	Organized meetings/events in the park	3	I spend time in both types of parks, but more often in neighbourhood ones	4	5	Rather yes	Too few benches, No sense of security, Thresholds too high	Rather no	Yes, I do (please write the name of them) , Jak dojade	Yes, I do (please write the name of them) , Maps	Man	18-29	Higher	Carer
79	Rather yes	Several to over a dozen times a year	Walk, Observe, Gym	Around 1 hour	Attractive plant compositons	3	I spend time in both types of parks, but more often in neighbourhood ones	4	3	Rather yes	Too few benches, No markings, Inadequate width of alleys	Rather no	No, but if I knew about them, I would be happy to use them	No, but if I knew about them, I would be happy to use them	Man	40-49	Higher	Partially sighted people
80	Absolutely yes	Several times a week	Walk	Around 1 hour	Better surface for easier mobility	3	I only spend time in neighbourhood parks	4	5	Rather yes	No slipway	Rather yes	Yes, I do (please write the name of them) , Jak dojade	Yes, I do (please write the name of them) , Plans	Woman	30-39	Higher	Carer
81	Absolutely yes	Everyday	Walk, Talk, Gym	Around 2-3 hours	Other... Phonic devices	5	I spend time in both types of parks, but more often in neighbourhood ones	4	4	Rather yes	Inappropriate entrance marking, Thresholds too high, Lack of phonic devices	Rather yes	No, but if I knew about them, I would be happy to use them	No, but if I knew about them, I would be happy to use them	Woman	30-39	High school	Blind people
82	Rather yes	Several times a week	Walk, Talk, Gym	Around 1 hour	Other... Phonic devices	5	I spend time in both types of parks, but more often in neighbourhood ones	4	3	Rather yes	Thresholds too high, Lack of infrastrucyure of blind and partially sighted people	Absolutely yes	No, but if I knew about them, I would be happy to use them	No, but if I knew about them, I would be happy to use them	Woman	30-39	High school	Partially sighted people
83	Rather yes	Several times a month	Gym	Up to 30 minutes	Organized meetings/events in the park	3	I spend time in both types of parks, but more often in neighbourhood ones	4	2	Rather yes	Inappropriate entrance marking, No markings, Difficult access to the park	Rather yes	No, and I would not use them even if they were accessible	Yes, I do (please write the name of them) , Maps, Models	Woman	30-39	High school	Blind people
84	Not sure	Several to over a dozen times a year	Observe	Up to 30 minutes	More benches	2	I only spend time in neighbourhood parks	1	3	Absolutely yes	Inappropriate entrance marking, Difficult access to the park, No railings	Rather no	No, and I would not use them even if they were accessible	No, and I would not use them even if they were accessible	Man	40-49	Basic	Blind people
85	Rather yes	Several times a month	Walk, Observe, Read	Around 1 hour	Organized meetings/events in the park	3	I spend time in both types of parks, but more often in destination ones	4	4	Rather no	No programme, No slipway	Rather yes	No, but if I knew about them, I would be happy to use them	No, but if I knew about them, I would be happy to use them	Man	30-39	Higher	People with mobility problems
86	Rather yes	Several times a month	Read	Around 1 hour	Better surface for easier mobility	4	I spend time in both types of parks, but more often in neighbourhood ones	2	2	Rather yes	Too few benches, No toilets, Thresholds too high	Rather no	No, and I would not use them even if they were accessible	No, but if I knew about them, I would be happy to use them	Man	>60	Vocational	Wheelchair users
87	Rather yes	Several to over a dozen times a year	Walk	Around 1 hour	Organized meetings/events in the park	3	I spend as much time in both types of parks	3	3	Absolutely yes	Inappropriate surface, Too few benches, Difficult access to the park	Rather yes	No, but if I knew about them, I would be happy to use them	No, but if I knew about them, I would be happy to use them	Man	40-49	Higher	Partially sighted people
88	Rather yes	Several times a week	Walk	Around 1 hour	More benches	4	I spend time in both types of parks, but more often in neighbourhood ones	4	4	Not sure	Inappropriate surface, Too few benches, No sense of security	Rather no	No, but if I knew about them, I would be happy to use them	No, but if I knew about them, I would be happy to use them	Woman	30-39	Higher	Carer
89	Rather yes	Several to over a dozen times a year	Read	Around 1 hour	Better surface for easier mobility	2	I spend as much time in both types of parks	2	2	Rather yes	Inappropriate surface, No programme, Difficult access to the park	Absolutely yes	No, but if I knew about them, I would be happy to use them	No, but if I knew about them, I would be happy to use them	Man	40-49	Higher	Wheelchair users
90	Rather yes	Several times a week	Walk	Around 1 hour	Organized meetings/events in the park	4	I only spend time in neighbourhood parks	4	4	Not sure	No programme, Thresholds too high	Rather no	No, but if I knew about them, I would be happy to use them	No, but if I knew about them, I would be happy to use them	Man	30-39	Higher	Carer
91	Rather yes	Several times a week	Walk	Around 1 hour	Organized meetings/events in the park	4	I only spend time in neighbourhood parks	2	4	Absolutely yes	Inappropriate entrance marking, No sense of security, Thresholds too high	Rather yes	No, and I would not use them even if they were accessible	No, but if I knew about them, I would be happy to use them	Man	>60	High school	Blind people
92	Rather yes	Everyday	Observe	Around 1 hour	The opportunity to meet with friends/new people	2	I only spend time in neighbourhood parks	3	3	Absolutely yes	Inappropriate surface, Too few benches, Difficult access to the park	Rather yes	No, and I would not use them even if they were accessible	No, and I would not use them even if they were accessible	Woman	>60	High school	People with mobility problems
93	Rather yes	Several times a week	Read	Around 1 hour	More benches	2	I spend time in both types of parks, but more often in neighbourhood ones	3	1	Rather yes	Too few benches, No sense of security, No railings	Rather yes	No, but if I knew about them, I would be happy to use them	No, but if I knew about them, I would be happy to use them	Woman	50-59	High school	Partially sighted people
94	Rather yes	Several times a week	Observe, Gym	Around 1 hour	Attractive plant compositons	4	I spend time in both types of parks, but more often in neighbourhood ones	2	2	Rather yes	Inappropriate surface, Too few benches, No slipway	Absolutely yes	No, and I would not use them even if they were accessible	No, and I would not use them even if they were accessible	Man	50-59	Vocational	Wheelchair users
95	Rather yes	Several times a week	Walk, Talk	Around 1 hour	The opportunity to meet with friends/new people	4	I spend as much time in both types of parks	3	3	Absolutely yes	Too few benches, No sense of security, No railings	Rather yes	No, but if I knew about them, I would be happy to use them	No, and I would not use them even if they were accessible	Woman	18-29	High school	Partially sighted people
96	Rather yes	Several times a month	Read	Around 1 hour	Better surface for easier mobility	3	I spend time in both types of parks, but more often in neighbourhood ones	2	3	Absolutely yes	Inappropriate surface, Difficult access to the park, No slipway	Rather no	No, but if I knew about them, I would be happy to use them	No, and I would not use them even if they were accessible	Woman	40-49	Higher	Wheelchair users
97	Not sure	Several times a week	Walk	Up to 30 minutes	Attractive plant compositons	4	I spend time in both types of parks, but more often in destination ones	4	2	Rather yes	Inappropriate surface, No sense of security, No toilets	Absolutely yes	No, and I would not use them even if they were accessible	No, but if I knew about them, I would be happy to use them	Woman	40-49	Vocational	Wheelchair users
98	Not sure	Several to over a dozen times a year	Walk	Around 2-3 hours	Organized meetings/events in the park	4	I spend time in both types of parks, but more often in destination ones	3	3	Absolutely yes	Too few benches, No programme, Thresholds too high	Not sure	No, but if I knew about them, I would be happy to use them	No, but if I knew about them, I would be happy to use them	Woman	30-39	Higher	Wheelchair users
99	Rather yes	Several times a week	Observe	Up to 30 minutes	More benches	3	I spend as much time in both types of parks	4	2	Absolutely yes	Inappropriate surface, Too few benches, No railings	Rather yes	No, and I would not use them even if they were accessible	No, and I would not use them even if they were accessible	Woman	50-59	Higher	Wheelchair users
100	Not sure	Several times a month	Walk	Around 2-3 hours	Organized meetings/events in the park	3	I spend time in both types of parks, but more often in destination ones	4	2	Absolutely yes	Too few benches, No sense of security, No slipway	Absolutely yes	No, but if I knew about them, I would be happy to use them	No, and I would not use them even if they were accessible	Woman	30-39	Vocational	Wheelchair users
101	Absolutely yes	Several times a month	Gym	Around 1 hour	Organized meetings/events in the park	4	I only spend time in neighbourhood parks	3	3	Absolutely yes	Too few benches, No sense of security, No toilets	Absolutely yes	No, and I would not use them even if they were accessible	No, and I would not use them even if they were accessible	Woman	40-49	Higher	Blind people
102	Absolutely yes	Several times a week	Observe	Up to 30 minutes	More benches	4	I spend as much time in both types of parks	3	4	Absolutely yes	Inappropriate surface, No markings, Thresholds too high	Rather yes	No, but if I knew about them, I would be happy to use them	No, but if I knew about them, I would be happy to use them	Man	18-29	High school	Blind people,
103	Absolutely yes	Several times a week	Walk	Around 1 hour	Better surface for easier mobility	3	I only spend time in neighbourhood parks	2	3	Absolutely yes	Inappropriate surface, Difficult access to the park	Rather yes	Yes, I do (please write the name of them) , google maps	No, and I would not use them even if they were accessible	Man	>60	Higher	People with mobility problems
								308	313
